# Supplementary material for: Assessing the ecological risk of heavy metal sediment contamination from Port Everglades Florida USA
Source: PeerJ journal article supplement (doi:10.7717/peerj.16152), 2023-11-14
Supplement: Supplemental_Figure_S1.pdf [file Supplemental_Figure_S1.pdf]

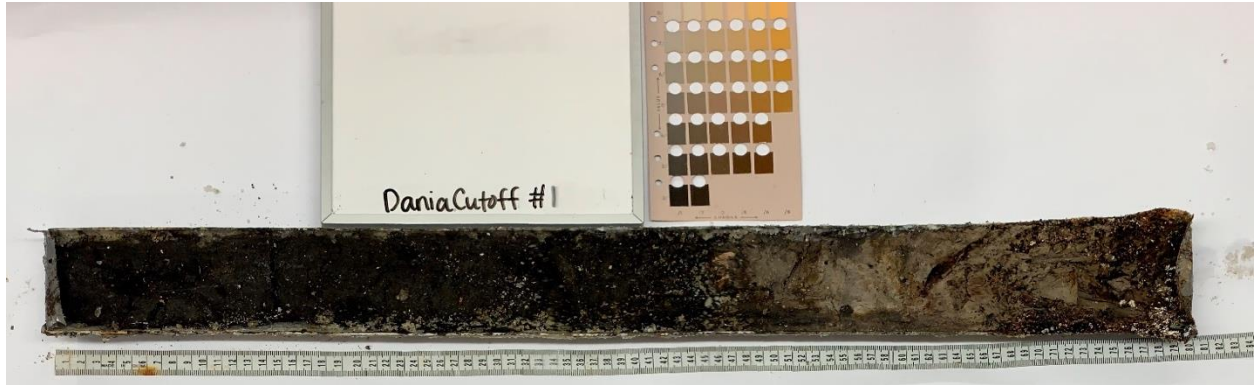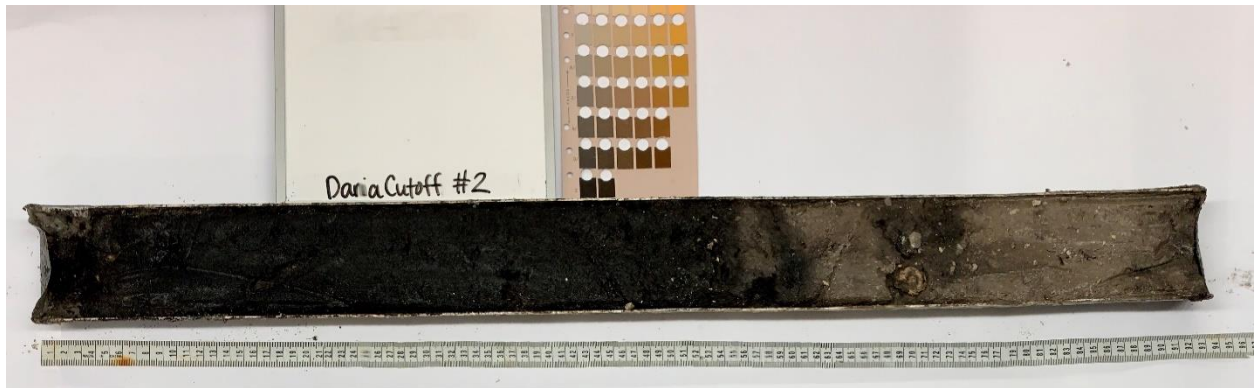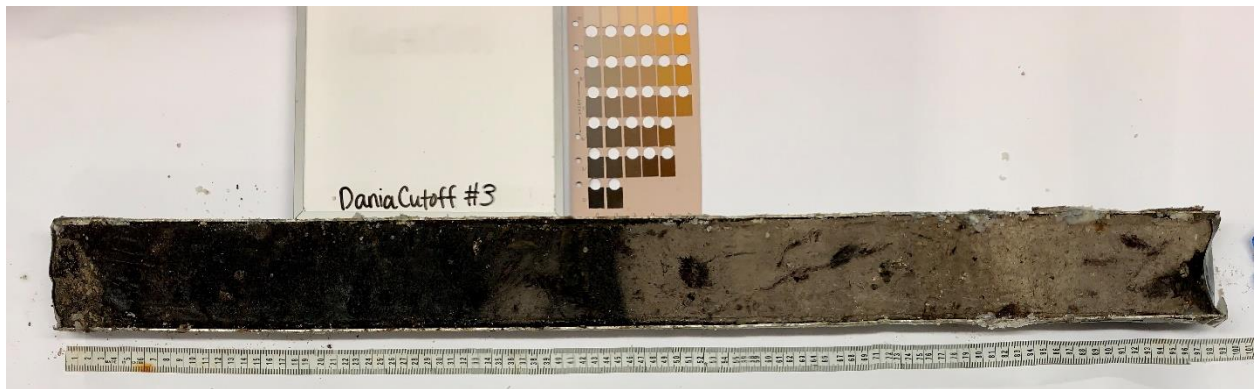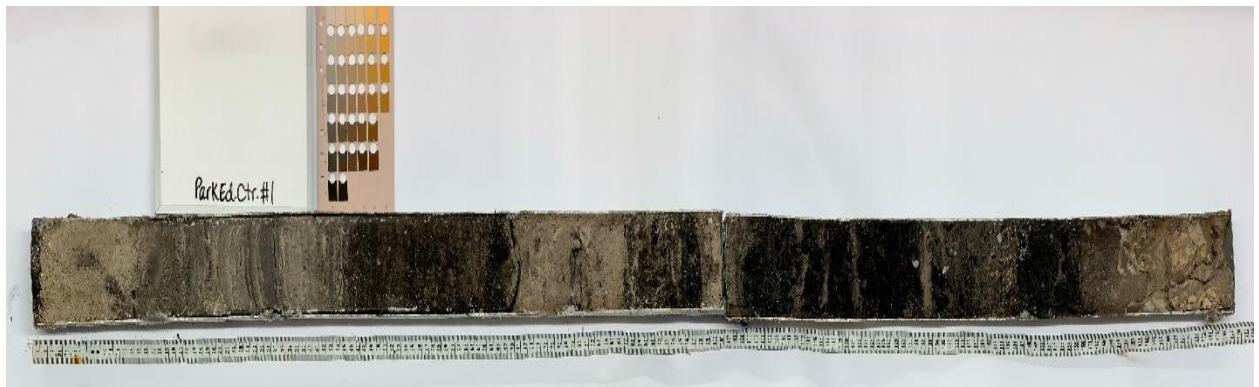

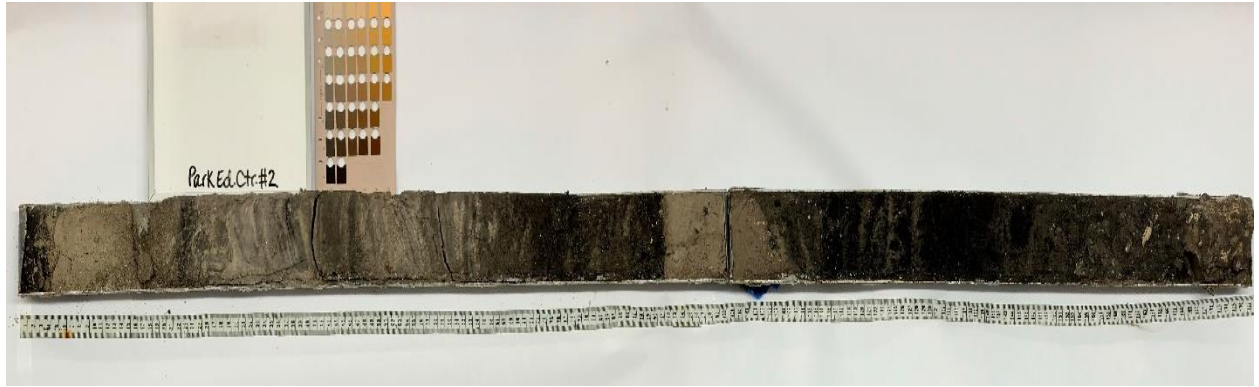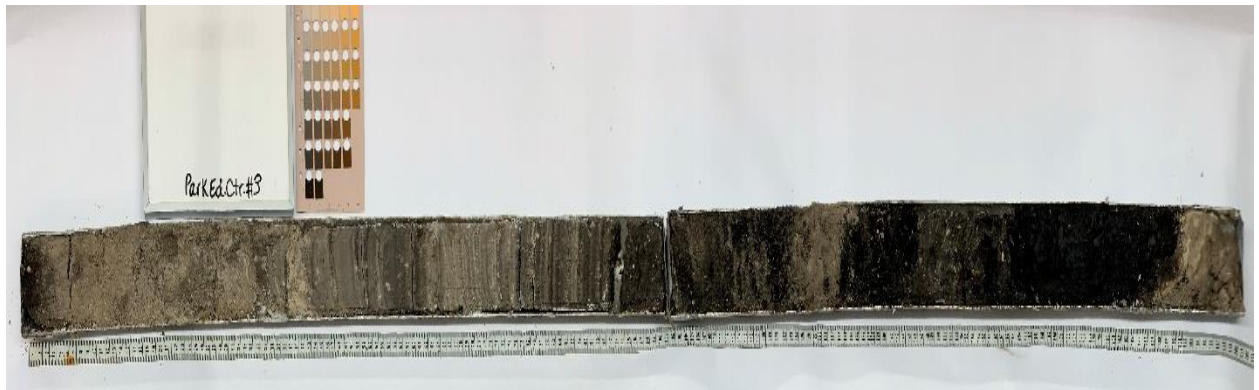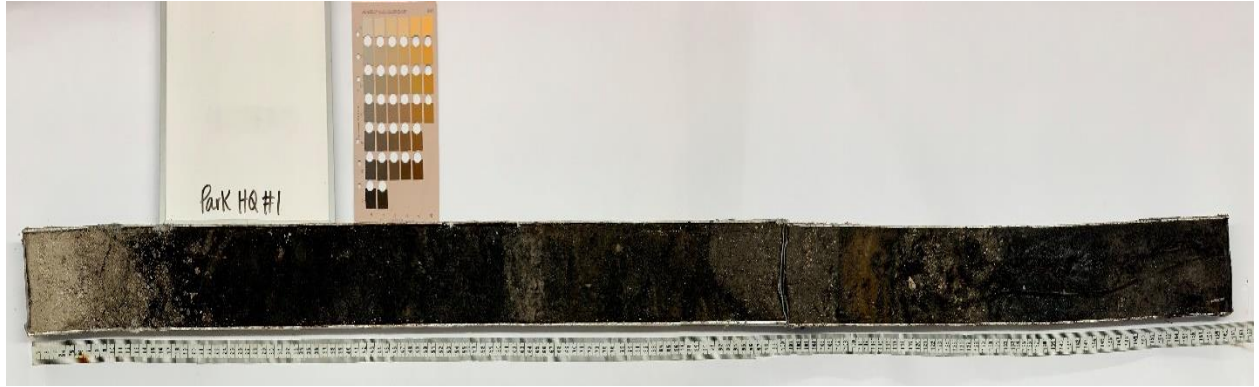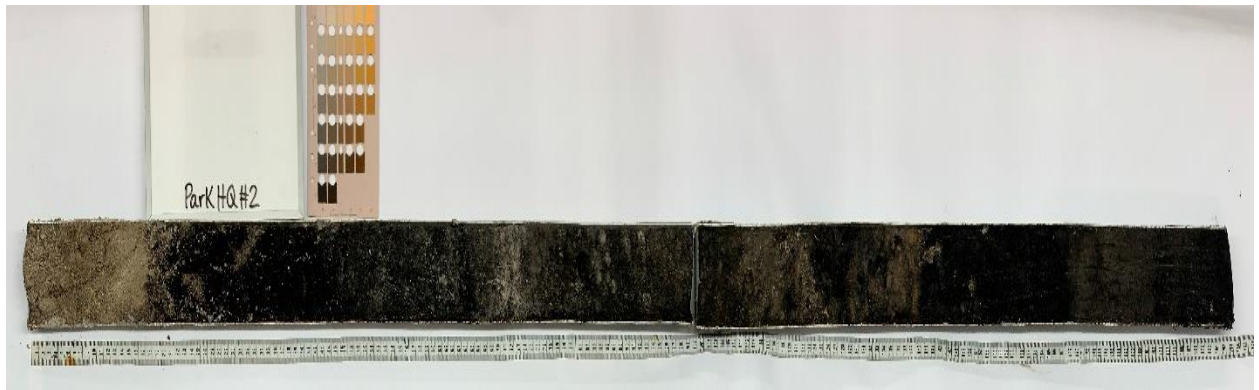

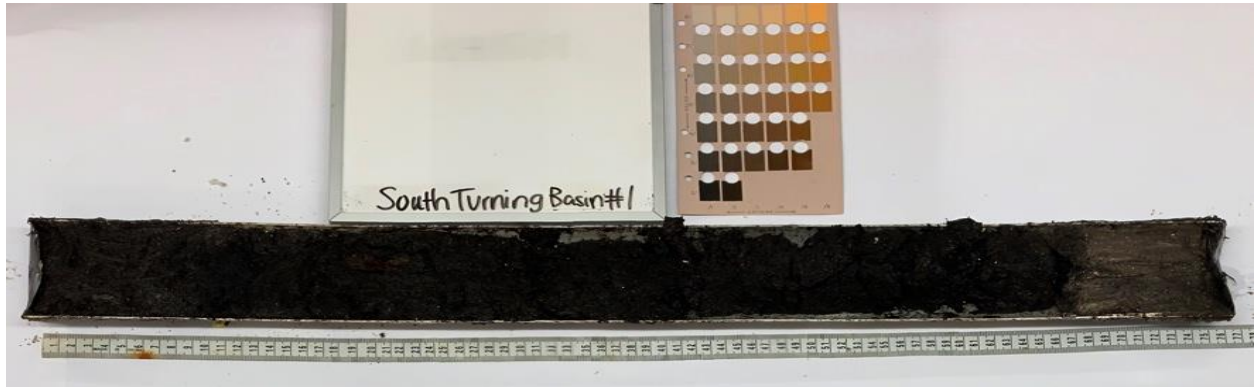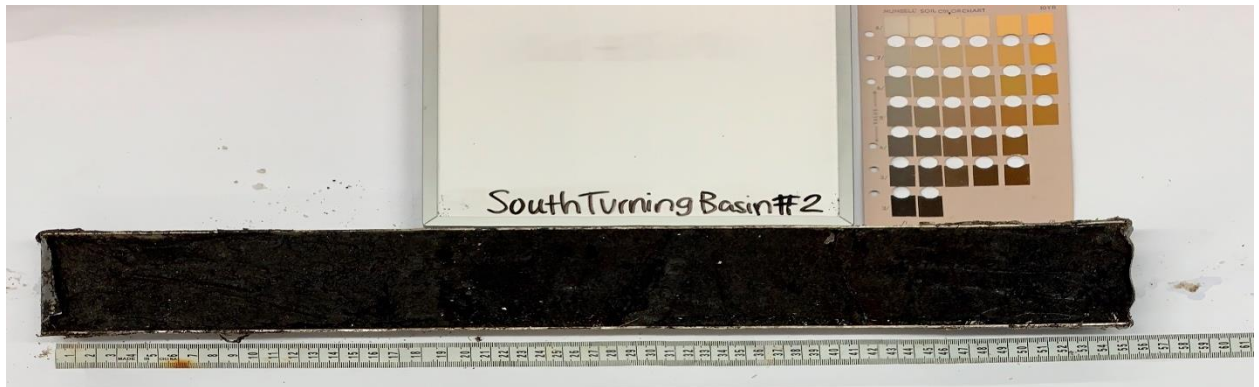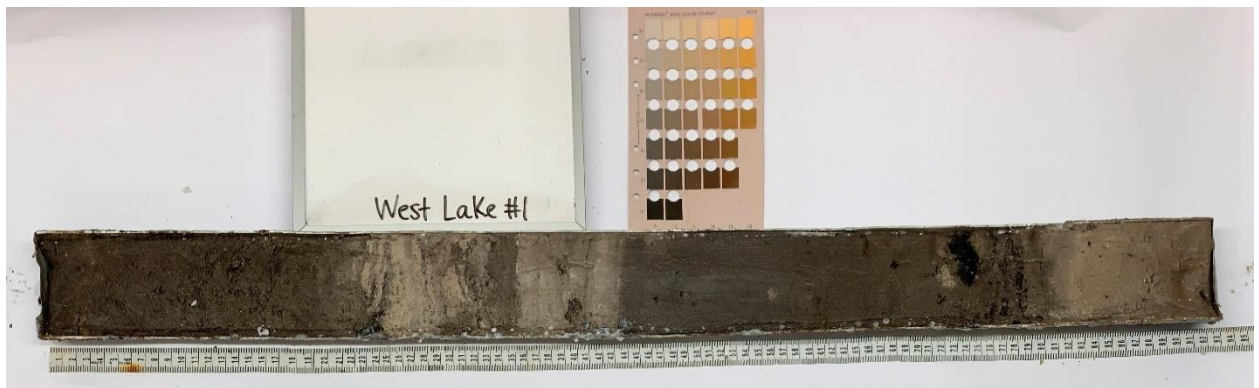

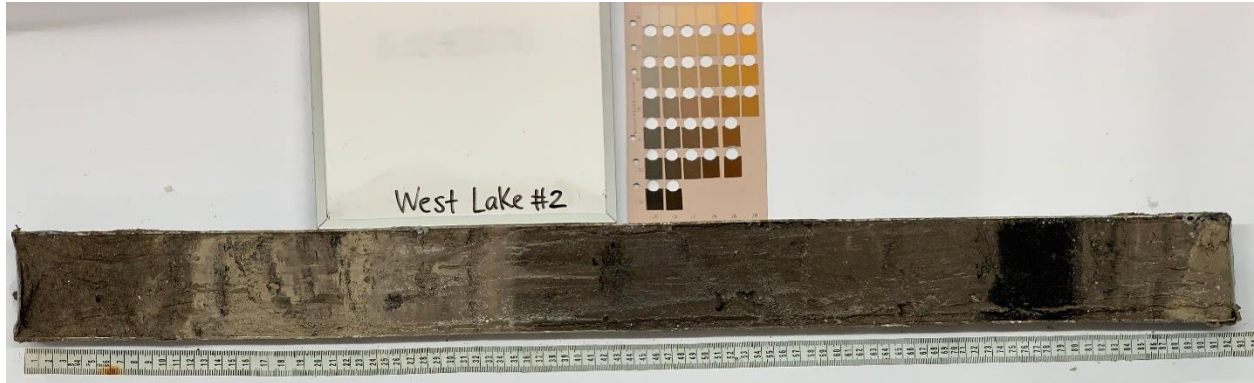

Figure S1. Split sediment cores for Dania Cutoff Canal (DCC), Park Education Center (PEC), Park Headquarters (PHQ), South Turning Basin (STB), and West Lake (WL). The left side of the core at 0 cm is the top (surface). Munsell sediment color chart is also shown.
